# Supplementary material for: Structural basis of transcription activation by the global regulator Spx
Source: PubMed Central journal article supplement — Nucleic Acids Res. 2021 Sep 16;49(18):10756–69. doi: 10.1093/nar/gkab790 (PMC8501982; doi:10.1093/nar/gkab790), 2021-09-16
Supplement: gkab790_supplemental_file.pdf [file gkab790_supplemental_file.pdf]

1 **Structural basis of transcription activation by the global regulator Spx**

2 Jing Shi<sup>1,#,\*</sup>, Fangfang Li<sup>1,#</sup>, Aijia Wen<sup>3,4,#</sup>, Libing Yu<sup>5,#</sup>, Lu Wang<sup>1</sup>, Fulin Wang<sup>1</sup>, Yuanling Jin<sup>1</sup>,  
3 Sha Jin<sup>3,4</sup>, Yu Feng<sup>3,4,\*</sup>, Wei Lin<sup>1,2,6,\*</sup>

4  
5 <sup>1</sup> Department of Pathogen Biology, School of Medicine & Holistic Integrative Medicine, Nanjing  
6 University of Chinese Medicine, Nanjing, China.

7 <sup>2</sup> State Key Laboratory of Natural Medicines, China Pharmaceutical University, Nanjing, China

8 <sup>3</sup> Department of Biophysics, Zhejiang University School of Medicine, Hangzhou, China.

9 <sup>4</sup> Department of Pathology of Sir Run Run Shaw Hospital, Zhejiang University School of  
10 Medicine, Hangzhou, China.

11 <sup>5</sup> Institute of Materials, China Academy of Engineering Physics, Mianyang, China

12 <sup>6</sup> Jiangsu Collaborative Innovation Center of Chinese Medicinal Resources Industrialization,  
13 Nanjing 210023, China.

14  
15 #, Equal contribution.

16  
17 \*, Correspondence: [weilin@njucm.edu.cn](mailto:weilin@njucm.edu.cn) OR [yufengjay@zju.edu.cn](mailto:yufengjay@zju.edu.cn) OR  
18 [shijing301@njucm.edu.cn](mailto:shijing301@njucm.edu.cn)

19  
20 Running title: Structural insights into the physiological function of Spx in bacteria

21

22

23

24

25

26

27

28

29

30 >*trxA-mango* promoter sequence:

31 CGGCTGTGATCAGGAAAAATAATTTGTAAGCATTAAAATAGCGTGAACGAATGGG

32 AGATGCTATACTAAAATCATCATTTCACATTGGAGGAATTCAATAATGGCGGCACG

33 TACGAAGGAAGGATTGGTATGTGGTATATTCGTACGTGCC

34

35 >*rrnJ P1-mango* promoter sequence:

36 TAGGGAAAGGATGCCGCTCTTTTAAATCCCTTAGTATTTCTTCAAAAAAACTATTG

37 CACTATTATTACTAGGTGGTATATTATTATTCGTTGCCGCTAAACAAGGCGATAACG

38 GGCACGTACGAAGGAAGGATTGGTATGTGGTATATTCGTACGTGCC

39

40 -44 element UP element -35 element -10 element Transcription products

41 mango

42

43 **Figure S1. The sequences of *trxA-mango* or *rrnJ P1-mango* promoter DNA.**

44 The -44 element, UP element, -35 element, -10 element and transcription products are  
45 highlighted in green, cyan, yellow, purple, and dark grey background, respectively. The  
46 *mango* sequence is colored in red with dark grey background.

47

48

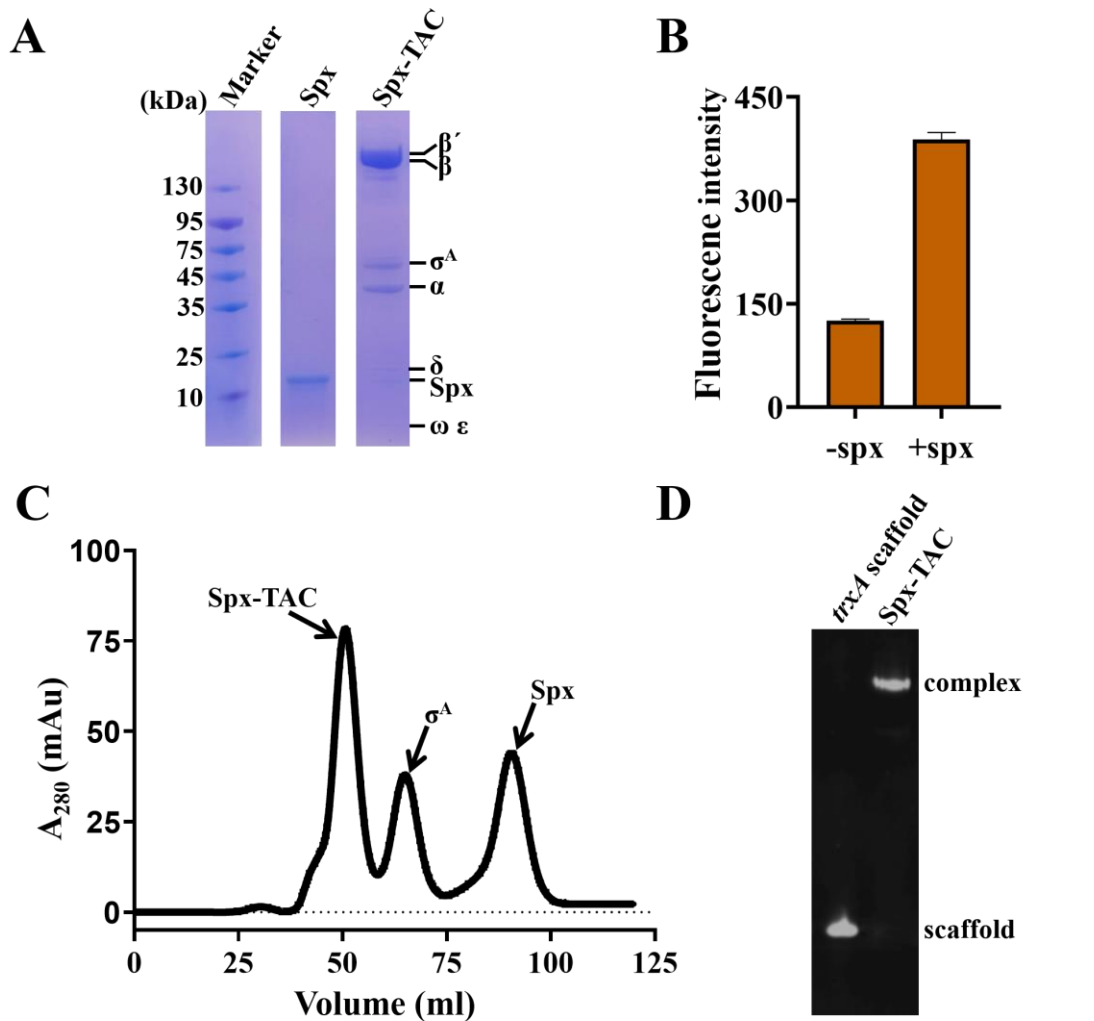

49

50 **Figure S2. Purification and verification of *B. subtilis* Spx-TAC**

51 (A) SDS-PAGE of the purified complex. 20 pmoles of complex was loaded.

52 (B) Relative transcription activity of *B. subtilis* RNAP-promoter open complex with  
53 or without Spx by using Mango-based transcription assay. Data for *in vitro* transcription  
54 assays are means of three technical replicates. Error bars represent mean  $\pm$  SEM of n = 3  
55 experiments.

56 (C) Chromatogram map of gel filtration.

57 (D) Native gel analysis of the purified complex. The gel was stained with 4S Red Plus  
58 Nucleic Acid Stain (Sangon Biotech, Inc.) according to the procedure of the  
59 manufacturer.

60

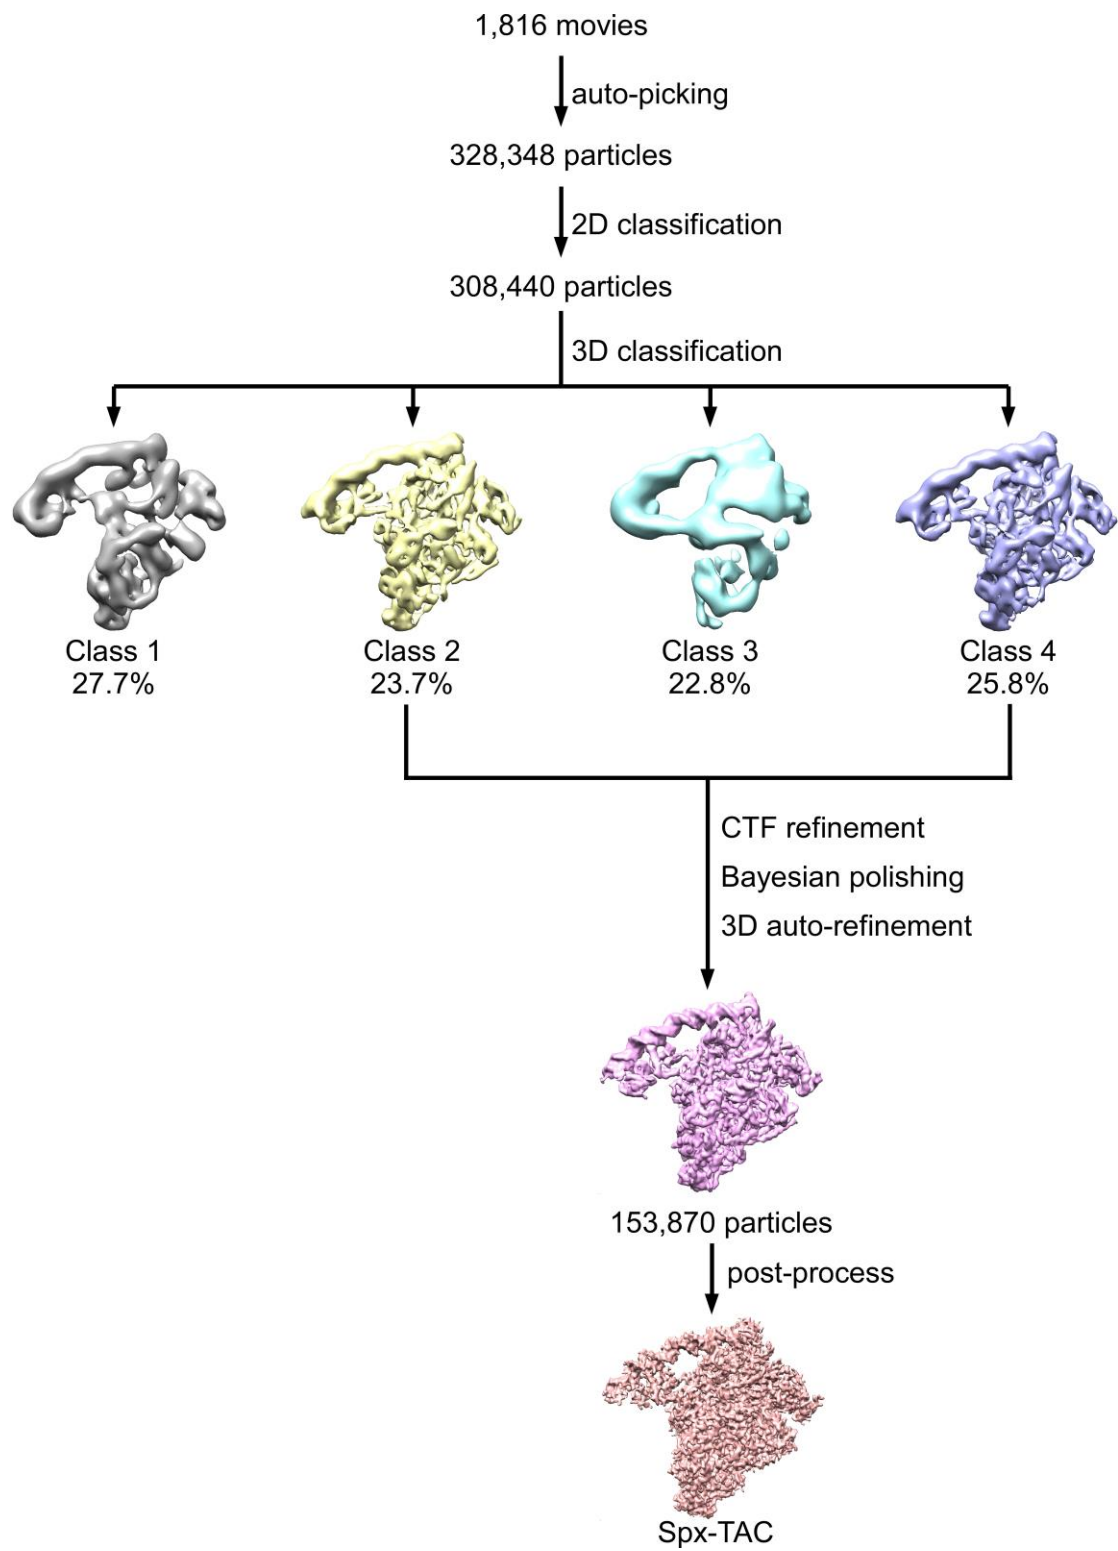

61

62 **Figure S3. Data processing pipeline for the dataset of Spx-TAC.**

63

64

65

66

67  
68  
69  
70  
71  
72  
73  
74  
75  
76  
77  
78  
79  
80  
81  
82  
83  
84  
85  
86  
87  
88  
89  
90  
91

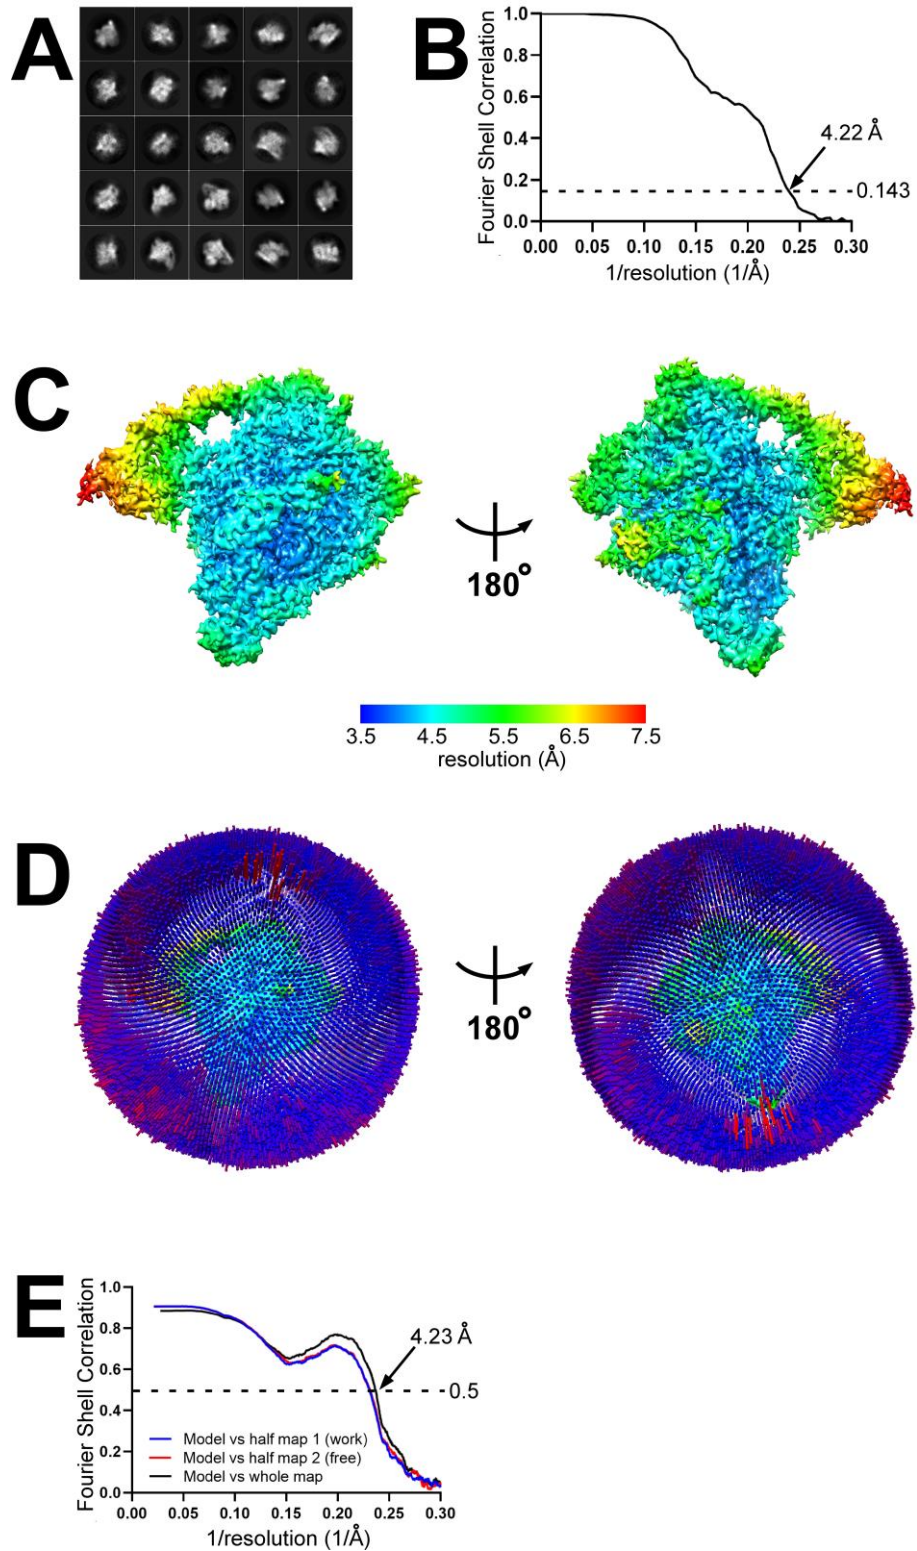

92 **Figure. S4. Cryo-EM of *B. subtilis* Spx-TAC.**

93 (A) Representative classes from 2D classification.  
94 (B) Gold-standard FSC. The gold-standard FSC was calculated by comparing the two  
95 independently determined half-maps from RELION. The dashed line represents the  
96 0.143 FSC cutoff, which indicates a nominal resolution of 4.22 Å.

97 (C) Cryo-EM density map colored by local resolution. Local resolution calculation  
98 was performed using blocres (1). View orientation as in **Figure 1B**.  
99 (D) Angular distribution of particle projections. View orientations as in (C).  
100 (E) FSC calculated between the model and the half map used for refinement (work),  
101 the other half map (free), and the full map.  
102  
103  
104  
105  
106  
107  
108  
109  
110  
111  
112  
113  
114

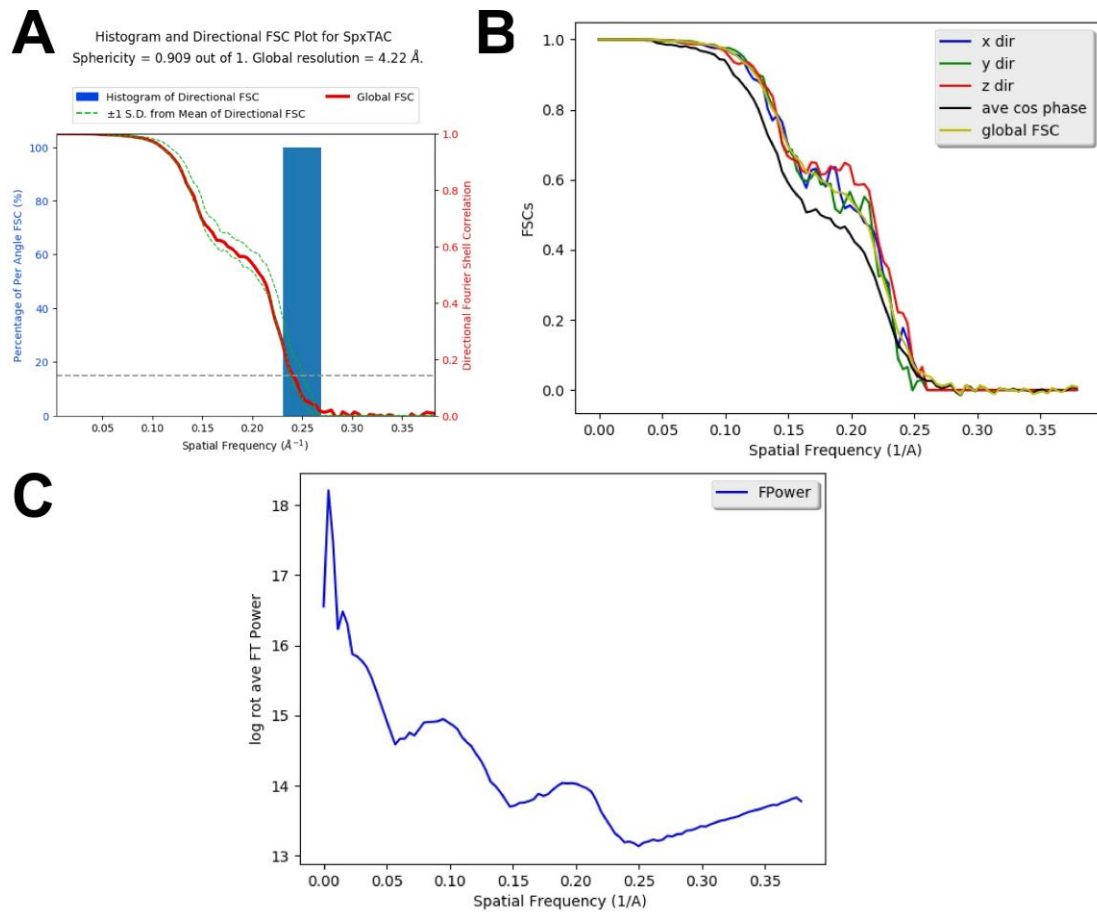

115

116 **Figure. S5. The SPA quality assessment of *B. subtilis* Spx-TAC from remote**  
 117 **3DFSC processing server (<https://3dfsc.salk.edu/>) followed the procedures as (2).**

118 (A) Histogram and directional FSC Plot for *B. subtilis* Spx-TAC.

119 (B) FSC plots for *B. subtilis* Spx-TAC. (C) FT power plot for *B. subtilis* Spx-TAC.

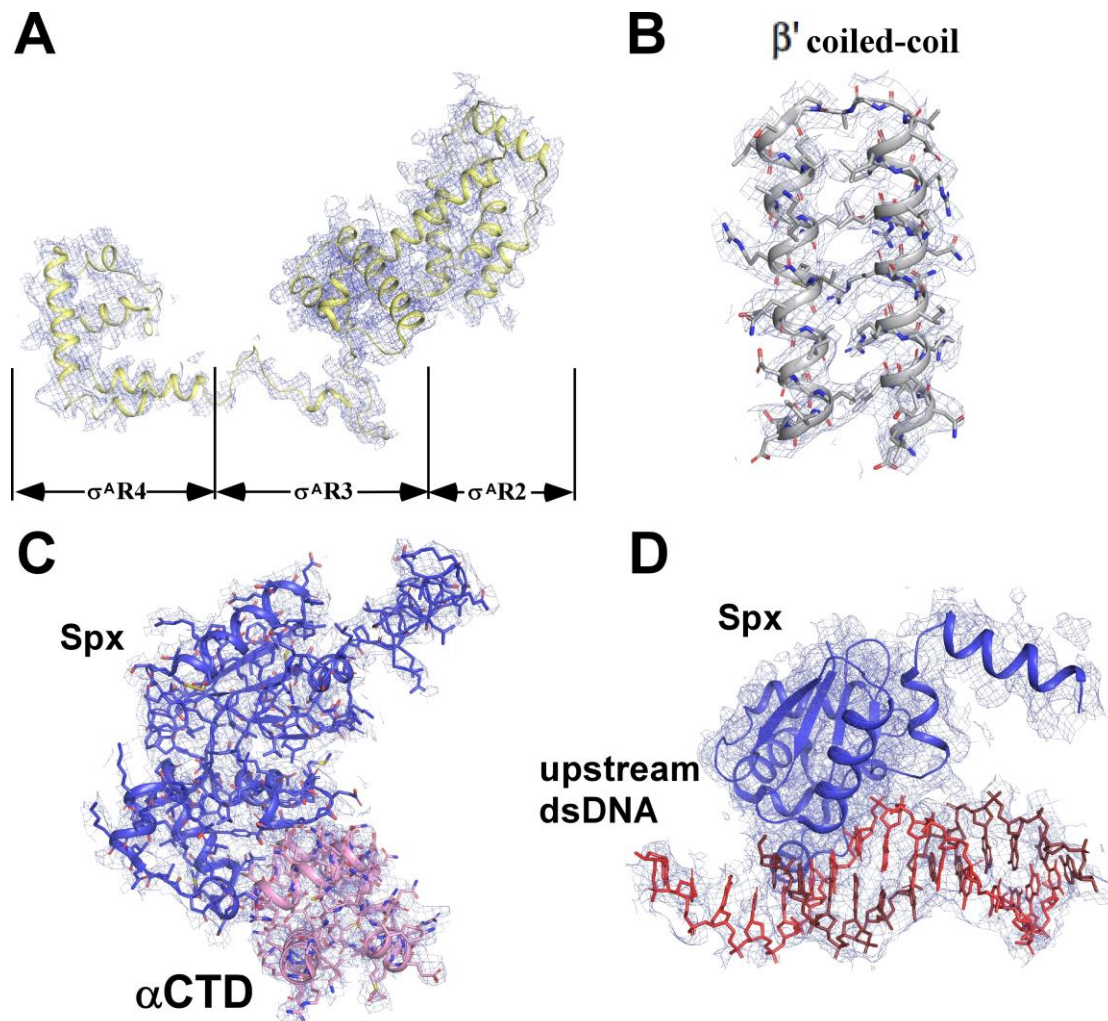

120

121 **Figure S6. Representative cryo-EM densities of superimposed models in**

122 **Spx-TAC.**

123 (A) Cryo-EM density map (blue mesh) and the superimposed model (yellow cartoon)

124 of  $\sigma^A$ . (B) Cryo-EM density map (blue mesh) and the superimposed model of  $\beta'$

125 coiled-coil. (C) Cryo-EM density map (blue mesh) and the superimposed model of

126 Spx-RNAP  $\alpha$ CTD subunit. (D) Cryo-EM density map (blue mesh) and the

127 superimposed model of Spx-DNA. Other colors are shown as in **Figure 1**.

128

129

130

131

132

133



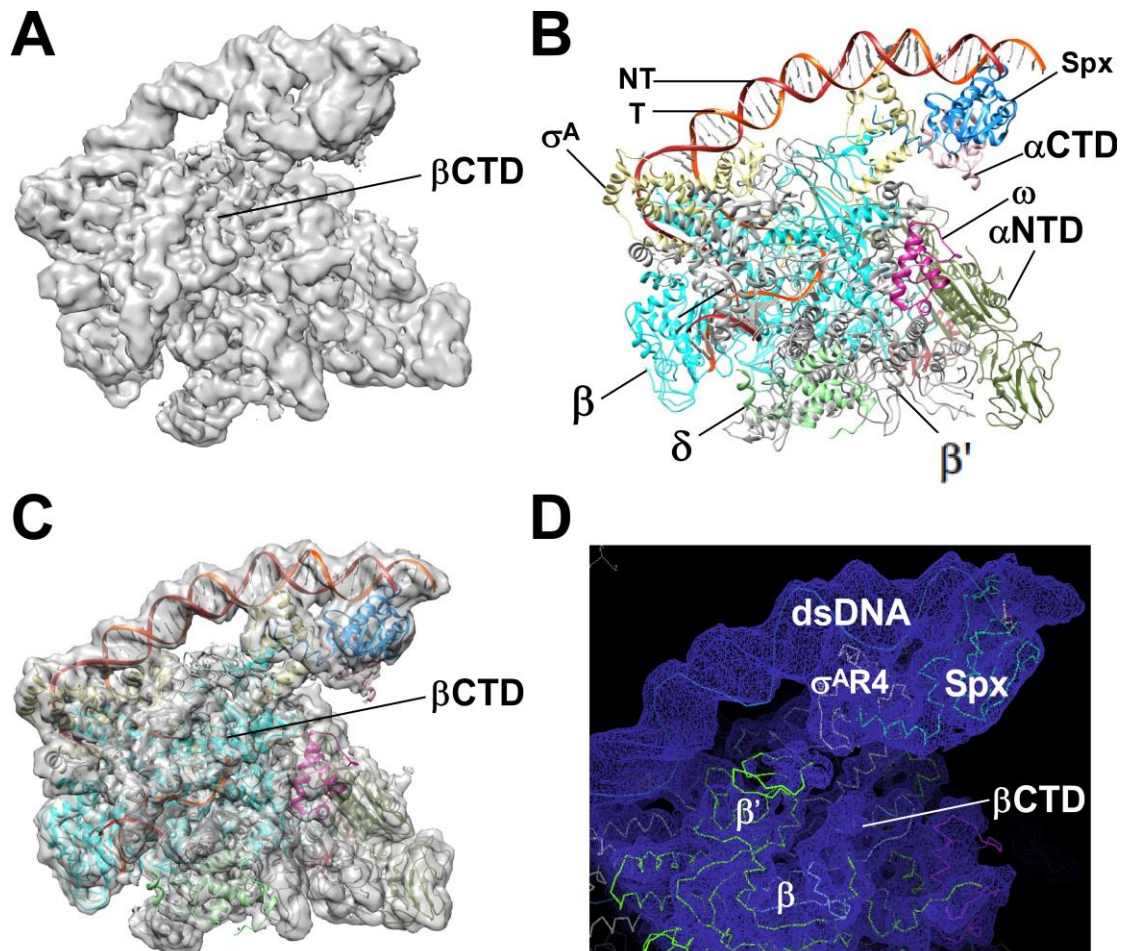

134

135 **Figure S7. Extra Cryo-EM density map for  $\beta$ CTD. (A-C)** Cryo-EM map and model for

136 Spx-TAC; **(D)** Extra Cryo-EM density map for  $\beta$ CTD is shown in coot. Other colors

137 are shown as in **Figure 1C**.

138

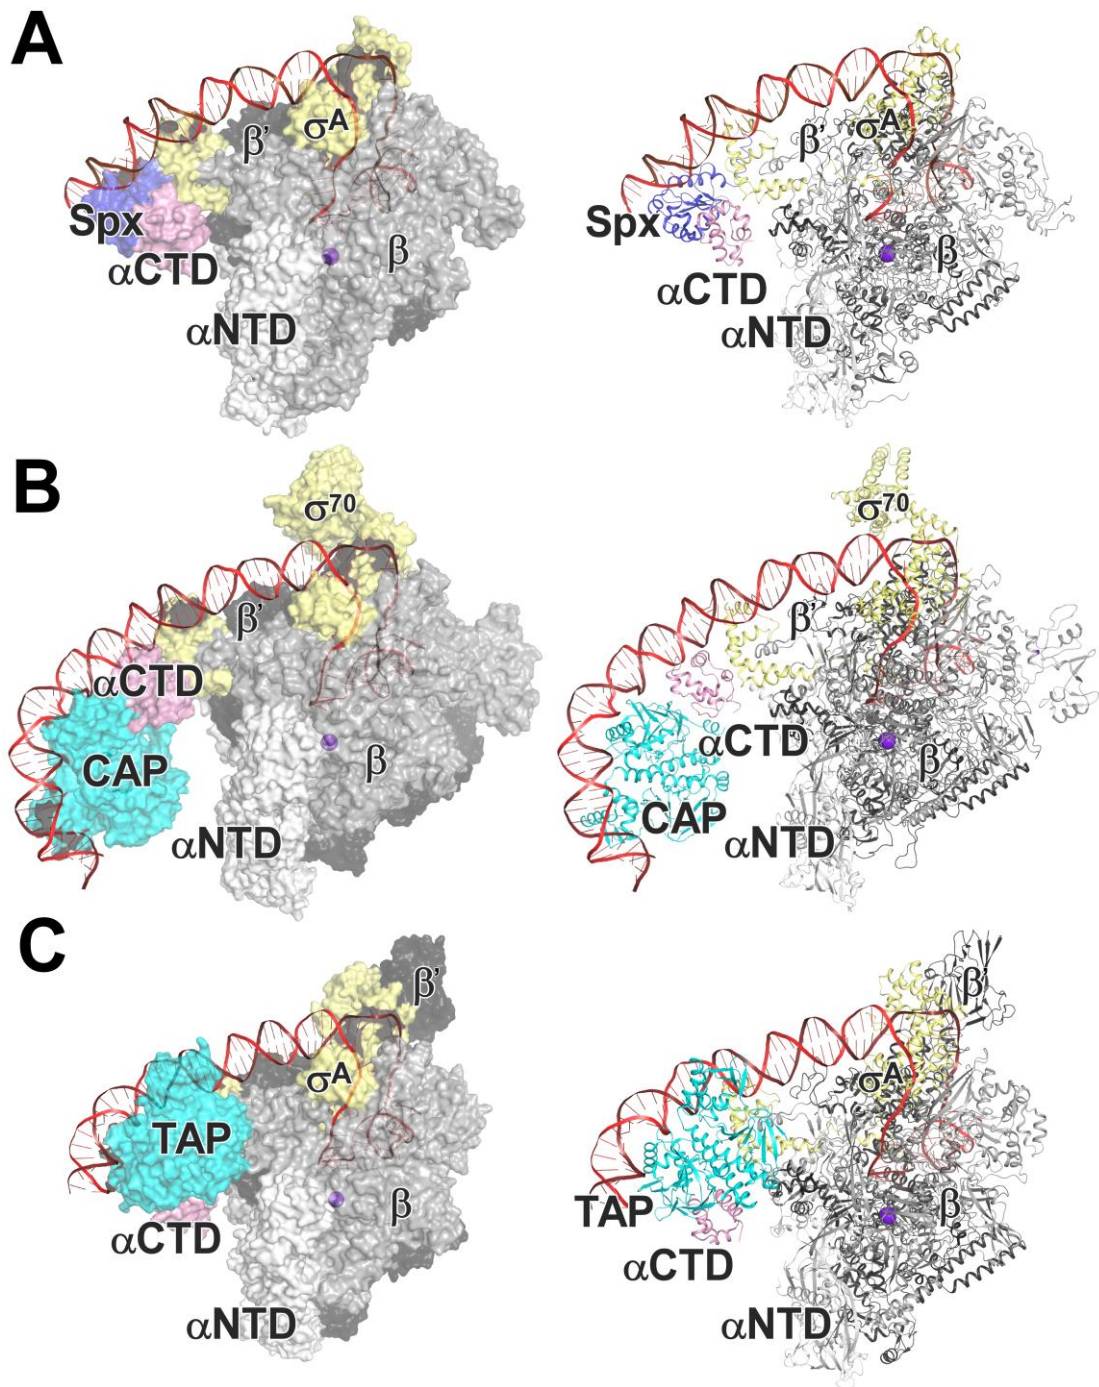

139

140 **Figure S8. Comparisons of Spx-TAC, TAP-TAC and CAP-TAC.**

141 (A-C) Spx-TAC, CAP-TAC and TAP-TAC (cartoon in left panel; surface in right

142 panel). Cyan, CAP or TAP; blue, Spx; yellow,  $\sigma$ ; white, pink, gray and dark gray,

143 RNAP  $\alpha$ NTD,  $\alpha$ CTD,  $\beta$ , and  $\beta'$ .

144

145

146

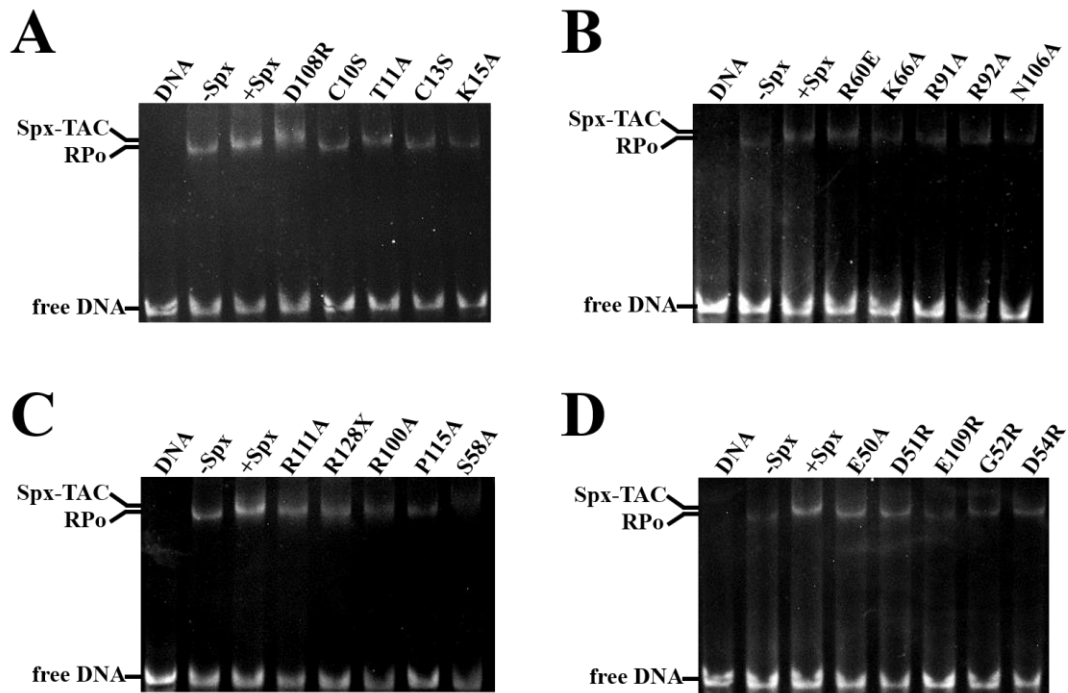

147

148 **Figure S9. Spx derivatives show defects on Spx-TAC formation.**

149 (A) Electrophoretic mobility shift assay for wild-type Spx and its mutants  
 150 (Spx-D108R, Spx-C10S, Spx-T11A, Spx-C13S and Spx-K15A). (B) Electrophoretic  
 151 mobility shift assay for wild-type Spx and its mutants (Spx-R60E, Spx-K66A,  
 152 Spx-R91A, Spx-R92A and Spx-N106A). (C) Electrophoretic mobility shift assay for  
 153 wild-type Spx and its mutants (Spx-R111A, Spx-R128X, Spx-R100A, Spx-P115A and  
 154 Spx-S58A). (D) Electrophoretic mobility shift assay for wild-type Spx and its mutants  
 155 (Spx-E50A, Spx-D51R, Spx-E109R, Spx-G52R and Spx-D54R). Reaction conditions  
 156 are described in detail in *Materials and Methods*. Bands of Spx-TAC, RPo and free  
 157 DNA (*trxA-mango* promoter DNA) are showed on the left, respectively.

158

159

160

161

162

163

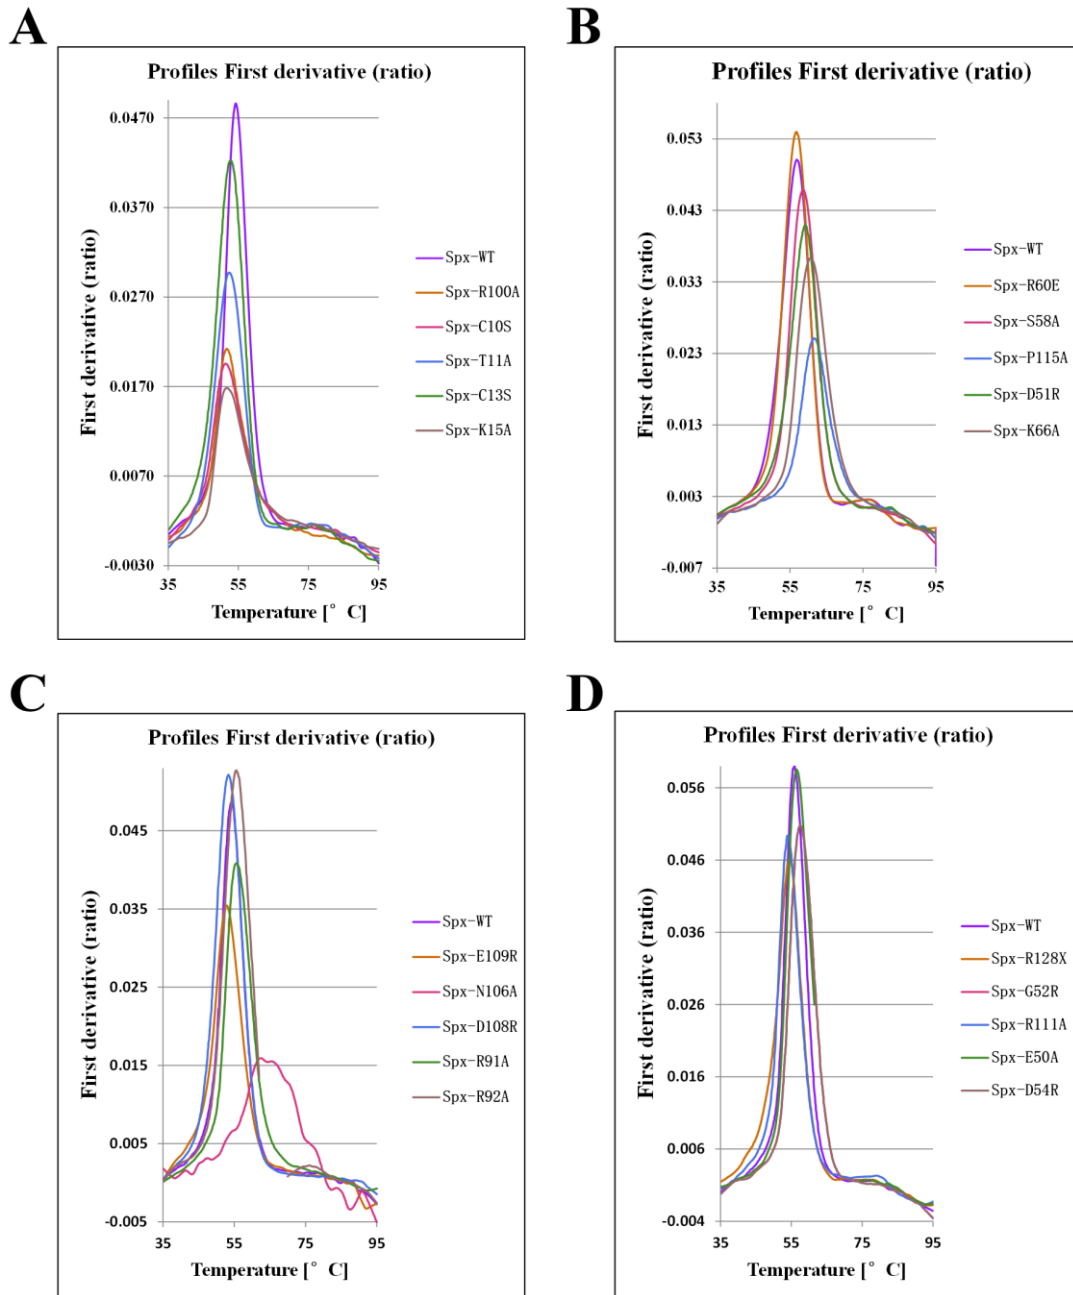

164

165 **Figure S10 Thermal stability assays to detect the stabilities of wild-type Spx and**  
 166 **its mutants and whether folded properly as wild-type Spx.**

167 (A) Thermal stability assays for wild-type Spx and its mutants (Spx-R100A,  
 168 Spx-C10S, Spx-T11A, Spx-C13S and Spx-K15A). (B) Thermal stability assays for  
 169 wild-type Spx and its mutants (Spx-R60E, Spx-S58A, Spx-P115A, Spx-D51R and  
 170 Spx-K66A). (C) Thermal stability assays for wild-type Spx and its mutants  
 171 (Spx-E109R, Spx-N106A, Spx-D108R, Spx-R91A and Spx-R92A). (D) Thermal

172 stability assays for wild-type Spx and its mutants (Spx-R128X, Spx-G52R,  
173 Spx-R111A, Spx-E50A and Spx-D54R). If the thermostability curve of Spx mutants is  
174 similar to that of wild-type Spx, the stabilities of these mutants will be similar to  
175 wild-type Spx and it also means the mutant proteins folded properly.

176

177

178

179

180

181

182

183

184

185

186

187

188

189

190

191

192

193

194

195

196

197

198

199

200

201

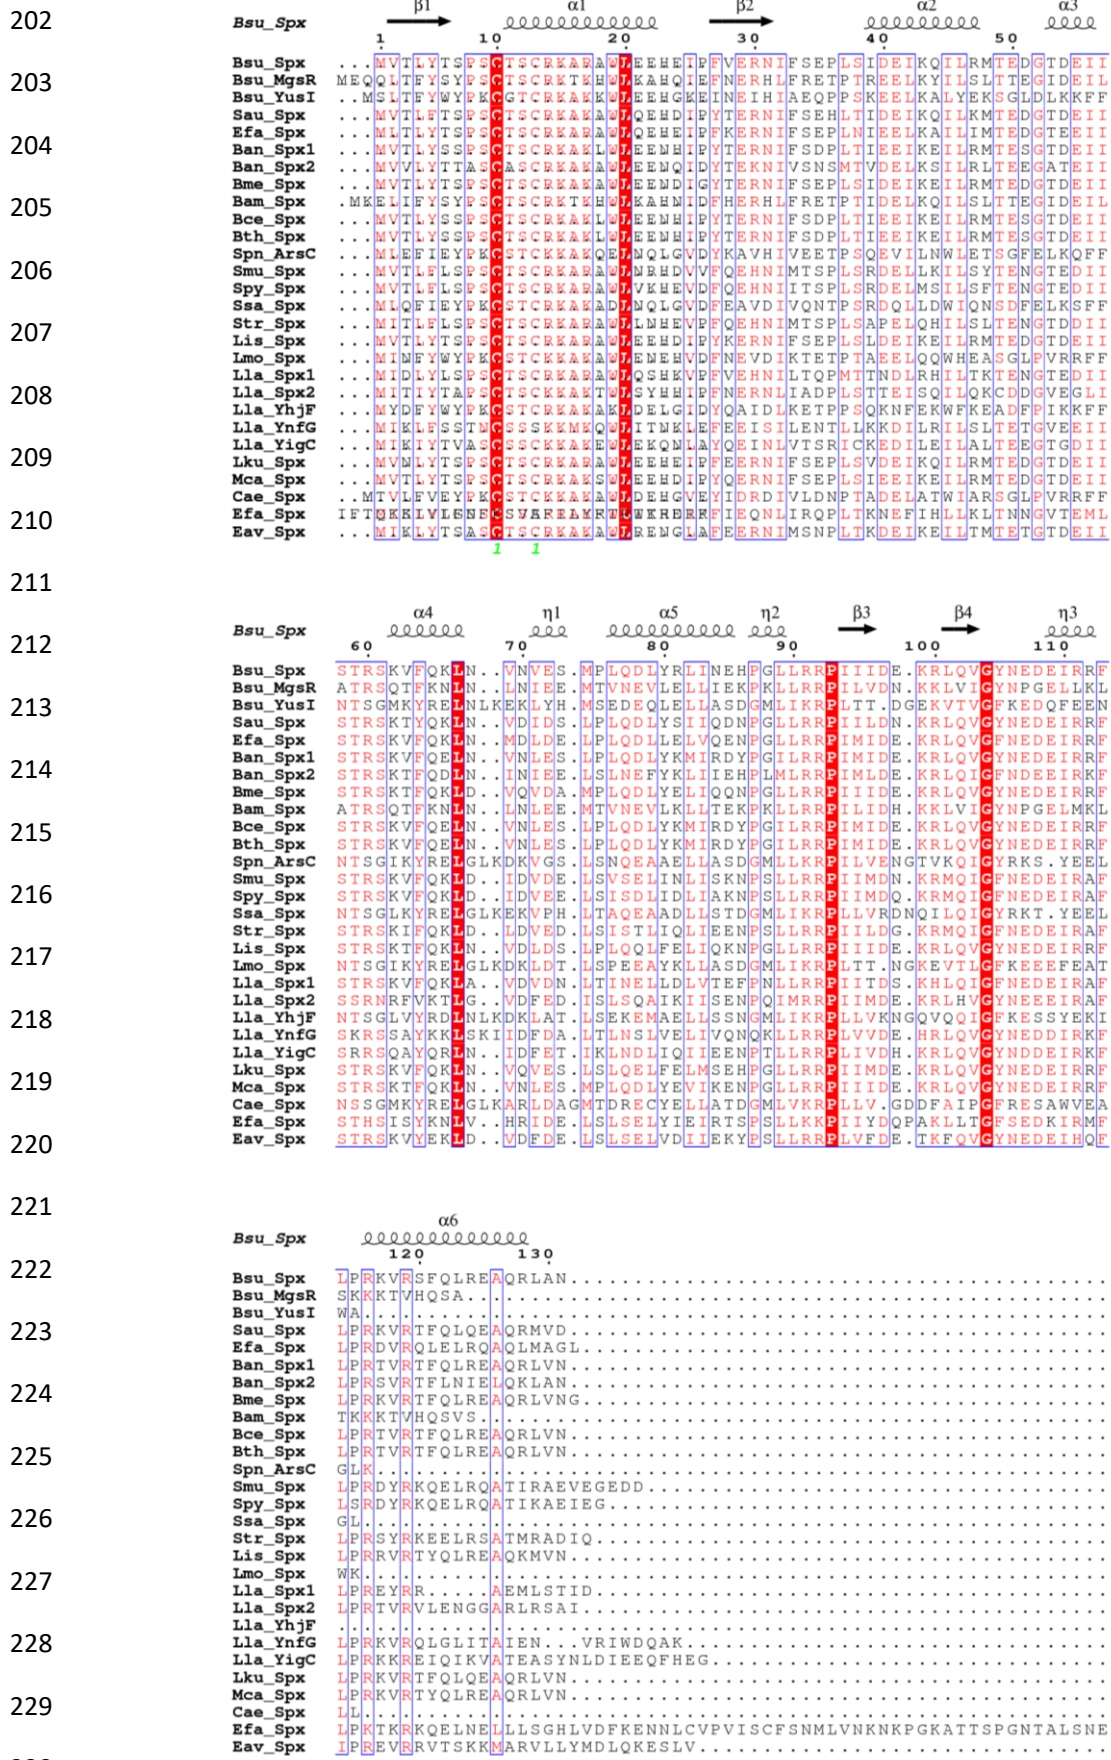

Figure S11 Protein sequence alignment of Spx from non-redundant 28

232 **low-GC-content Gram-positive bacterial species.** The sequences were extracted  
233 from UniProt Database by BLAST. The alignment was performed by Clustal Omega  
234 and the figure was prepared using ESPript 3.0 (3). The invariant residues among Spx  
235 from different low-GC-content Gram-positive bacteria are highlighted in red, and  
236 conserved amino acids are boxed.

237

238

239

240

241

242

243

244

245

246

247

248

249

250

251

252

253

**Table S1. Primers and sequences used in this study.**

| <b>Primer name</b>      | <b>Sequence (5' to 3')</b>                                |
|-------------------------|-----------------------------------------------------------|
| <i>trxA-mango_F1</i>    | cggtgtgatcaggaaaaataatttgaagcattaaaatagcgtgaacgaatgggag   |
| <i>trxA-mango_F2</i>    | atagcgtgaacgaatgggagatgtactactaaaaatcatcattcacattggagg    |
| <i>trxA-mango_R1</i>    | ggcacgtacgaatataccacataccaatccttccttcgtacg                |
| <i>trxA-mango_R2</i>    | accaatccttccttcgtacgtgccgccattattgaattcctccaatgtgaaatgatg |
| <i>rrnJ P1-mango_F1</i> | tagggaaaggatgccgctcttttaaatcccttagtatttctcaaaaaactattgcac |
| <i>rrnJ P1-mango_F2</i> | ctcaaaaaactattgcactattatttactaggtggtatattatttcggtgccgc    |
| <i>rrnJ P1-mango_R1</i> | ggcacgtacgaatataccacataccaatccttccttcgtacgtgcc            |
| <i>rrnJ P1-mango_R2</i> | tccttccttcgtacgtgccggtatgccttggttagcggcaacgaataataataacc  |
| G52R sense              | ctgcgtatgaccgaagatgcaccgatgaaatc                          |
| G52R antisense          | gatttcacgtggtgcatcttcggtcatacgcag                         |
| D54R sense              | gaccgaagatggcaccctgaaatcatctctaccg                        |
| D54R antisense          | cggttagagatgatttcacgggtgccatcttcggtc                      |
| C10S sense              | gtacaccagcccagcagcaccagctgcc                              |
| C10S antisense          | ggcagctggtgctgctcgggctggtgtac                             |
| T11A sense              | gcccagctgcgccagctgccgt                                    |
| T11A antisense          | acggcagctggcgcagctcgggc                                   |
| C13S sense              | gagctgcaccagcagccgtaaagcgcgtg                             |
| C13S antisense          | cacgcgctttacggctgctggtgcagctc                             |
| K15A sense              | tgcaccagctgccgtgcagcgcgtgcgtggc                           |
| K15A antisense          | acgcacgcgctgcacggcagctggtgcagc                            |
| S58A sense              | gcaccgatgaaatcatcgtaccctagcaaagt                          |
| S58A antisense          | actttgctacggtagcgtatgattcatcgggtgc                        |
| R60E sense              | caccgatgaaatcatctaccgagagcaaagtttccagaaactg               |
| R60E antisense          | cagtttctggaaaacttctctcggtagagatgatttcacgggtg              |
| K66A sense              | cgtagcaaagtttccaggagctgaacgftaacggtgaaagc                 |
| K66A antisense          | gctttcaacgftaacgftcagctcctggaaaacttctgctacg               |
| R91A sense              | catccgggtctgctggctcgtccgatcatcatc                         |
| R91A antisense          | gatgatgatcggacgagccagcagaccggatg                          |
| R92A sense              | catccgggtctgctgctgctccgatcatcatcgatg                      |
| R92A antisense          | catggatgatgatcggagcagcagcagaccggatg                       |
| N106A sense             | tctgcaggttggttacgccgaagatgaaatccgctc                      |
| N106A antisense         | acggatttcattcttcggcgtaaccaacctgcagac                      |
| D108R sense             | gttggttacaacgaagctgaaatccgctgtttcc                        |
| D108R antisense         | gaaacgacggatttcagctcgttgaaccaacc                          |
| E50A sense              | cctgcgtatgaccgcagatggcaccgatga                            |
| E50A antisense          | catcgggtccatctcgggtcatacgcaggatc                          |
| D51R sense              | tcctgcgtatgaccgaactggcaccgatgaaatc                        |
| D51R antisense          | gatttcacgtggtgccacgttcggtcatacgcagg                       |
| R100A sense             | ccgatcatcatcgatgaaaagctctgcaggttggttac                    |
| R100A antisense         | accaacctgcagagcttttcatcgatgatgatcggac                     |



|                      |                                             |
|----------------------|---------------------------------------------|
| E109R sense          | tggttacaacgaagatgcaatccgctggttcctgc         |
| E109R antisense      | gcaggaaacgacggattgcatcttcggtgtaacca         |
| R111A sense          | acaacgaagatgaaatcgctcgtttcctgccgcgtaaag     |
| R111A antisense      | acgcggcaggaaacgagcgatttcattcttcggtgtaac     |
| P115A sense          | gaaatccgctggttcctggcgcgtaaagttag            |
| P115A antisense      | ctacgaactttacgcgccaggaaacgacggatttc         |
| R128X sense          | ccagctgctggaagcgcagtagctggcgaactaaaagcttg   |
| R128X antisense      | caagcttttagttcgccagctactgcgcttcacgcagctgg   |
| pET28a_F             | caccaccaccaccactg                           |
| pET28a_R             | gctgccgcgcggcaccag                          |
| Bs_α_F               | gcctggtgccgcgcggcagcatgatcgagattgaaaaacaaaa |
| Bs_α_R               | cagtgggtgggtgggtgtcaatcgtctttgcgaagtcc      |
| Bs_σ <sup>A</sup> _F | gcctggtgccgcgcggcagcatggctgataaacaacccacg   |
| Bs_σ <sup>A</sup> _R | ctcagtgggtgggtgggtgttattcaaggaaatcttcaaacg  |

255

256

257

258

259

260

## 261 **Supplementary References**

262 1. Cardone, G., Heymann, J.B. and Steven, A.C. (2013) One number does not fit all: mapping  
263 local variations in resolution in cryo-EM reconstructions. *J. Struct. Biol.*, **184**, 226-236.

264 2. Tan, Y.Z., Baldwin, P.R., Davis, J.H., Williamson, J.R., Potter, C.S., Carragher, B. and  
265 Lyumkis, D. (2017) Addressing preferred specimen orientation in single-particle cryo-EM  
266 through tilting. *Nature methods.*, **14(8)**, p.793.

267 3. Robert, X. and Gouet, P. (2014) Deciphering key features in protein structures with the new  
268 ENDscript server. *Nucleic Acids Res.*, **42**, W320-W3244.

269
